# Supplementary material for: MiR-199a-5p regulates sirtuin1 and PI3K in the rat hippocampus with intrauterine growth restriction
Source: PubMed Central journal article supplement (PMC6138635; doi:10.1038/s41598-018-32189-5), 2018-09-14
Supplement: 41598_2018_32189_MOESM1_ESM.pdf [file 41598_2018_32189_MOESM1_ESM.pdf]

**MiR-199a-5p regulates sirtuin1 and PI3K in the rat  
hippocampus with intrauterine growth restriction**

**Juncao Chen<sup>1,2</sup>, Xiaoyun Gong<sup>2</sup>, Li Huang<sup>2</sup>, Pingyang Chen<sup>2\*</sup>,  
Tao Wang, Wei Zhou<sup>3</sup>, Kaiju Luo<sup>2</sup>, Jing Wang<sup>2</sup>**

1, Institute of Pediatrics, Guangzhou Women and Children's Medical Centre,

Guangzhou Medical University, Guangzhou 510623, China

2, Division of Neonatology, The Second Xiangya Hospital, Central South University,  
139 Renmin Middle Rd, Changsha, Hunan, China, 410011.

3. Division of Neonatology, Guangzhou Women and Children's Medical Centre,

Guangzhou Medical University, Guangzhou 510623, China

Corresponding author: Pingyang Chen. Email: chenpingyang@CSU.edu.cn

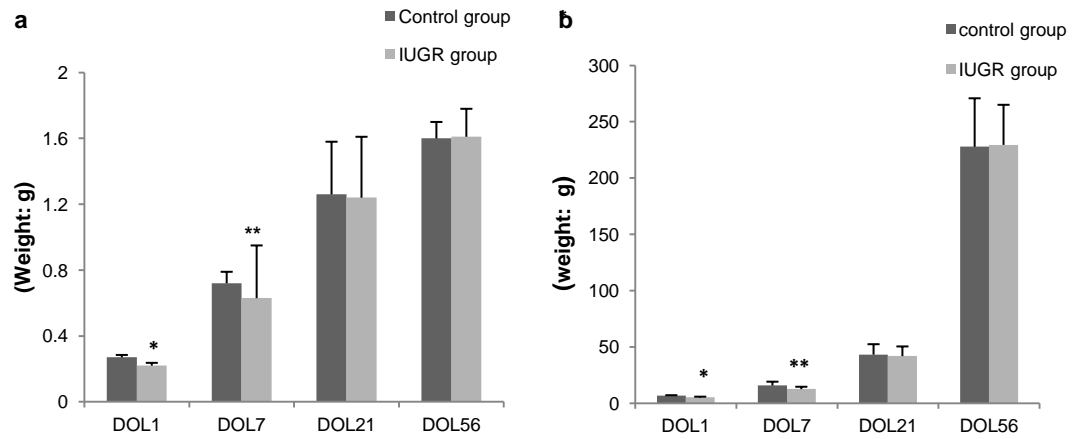

**1. Fig. S1. Brain weights and Body weight at different times.** (a) The weight of brain between the control and IUGR groups at different times after birth. (b) The body weight between the control and IUGR groups at different times after birth. The values are expressed as the mean  $\pm$ SD. \* $P < 0.05$ , \*\* $P < 0.01$ .

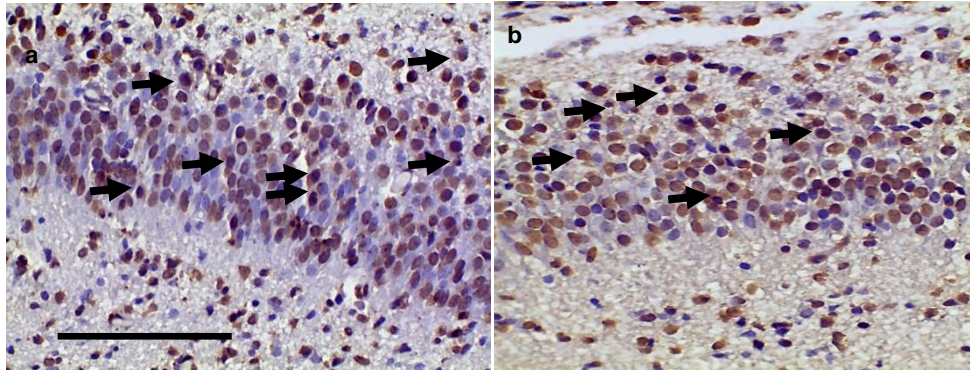

2. Fig. S2. Apoptotic nuclei stained using the TUNEL technique in the hippocampi CA1 region of the control group (a) and the IUGR group (b) of the DOL1 rats. Original magnification  $\times 400$ . Scale bars =  $200\mu\text{m}$ .

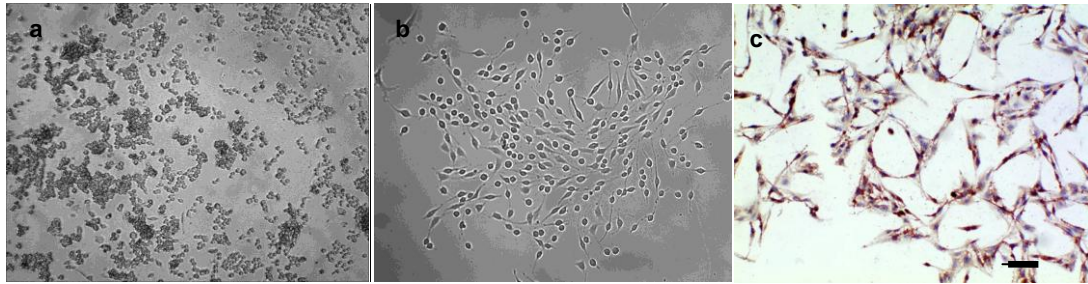

**3. Figure S3. PC12 Cell culture and treatment. (a) PC12 cell culture. (b) PC12 cells treated by NGF. (c) PC12 cells staining by NSE. Original magnification  $\times 100$ .**

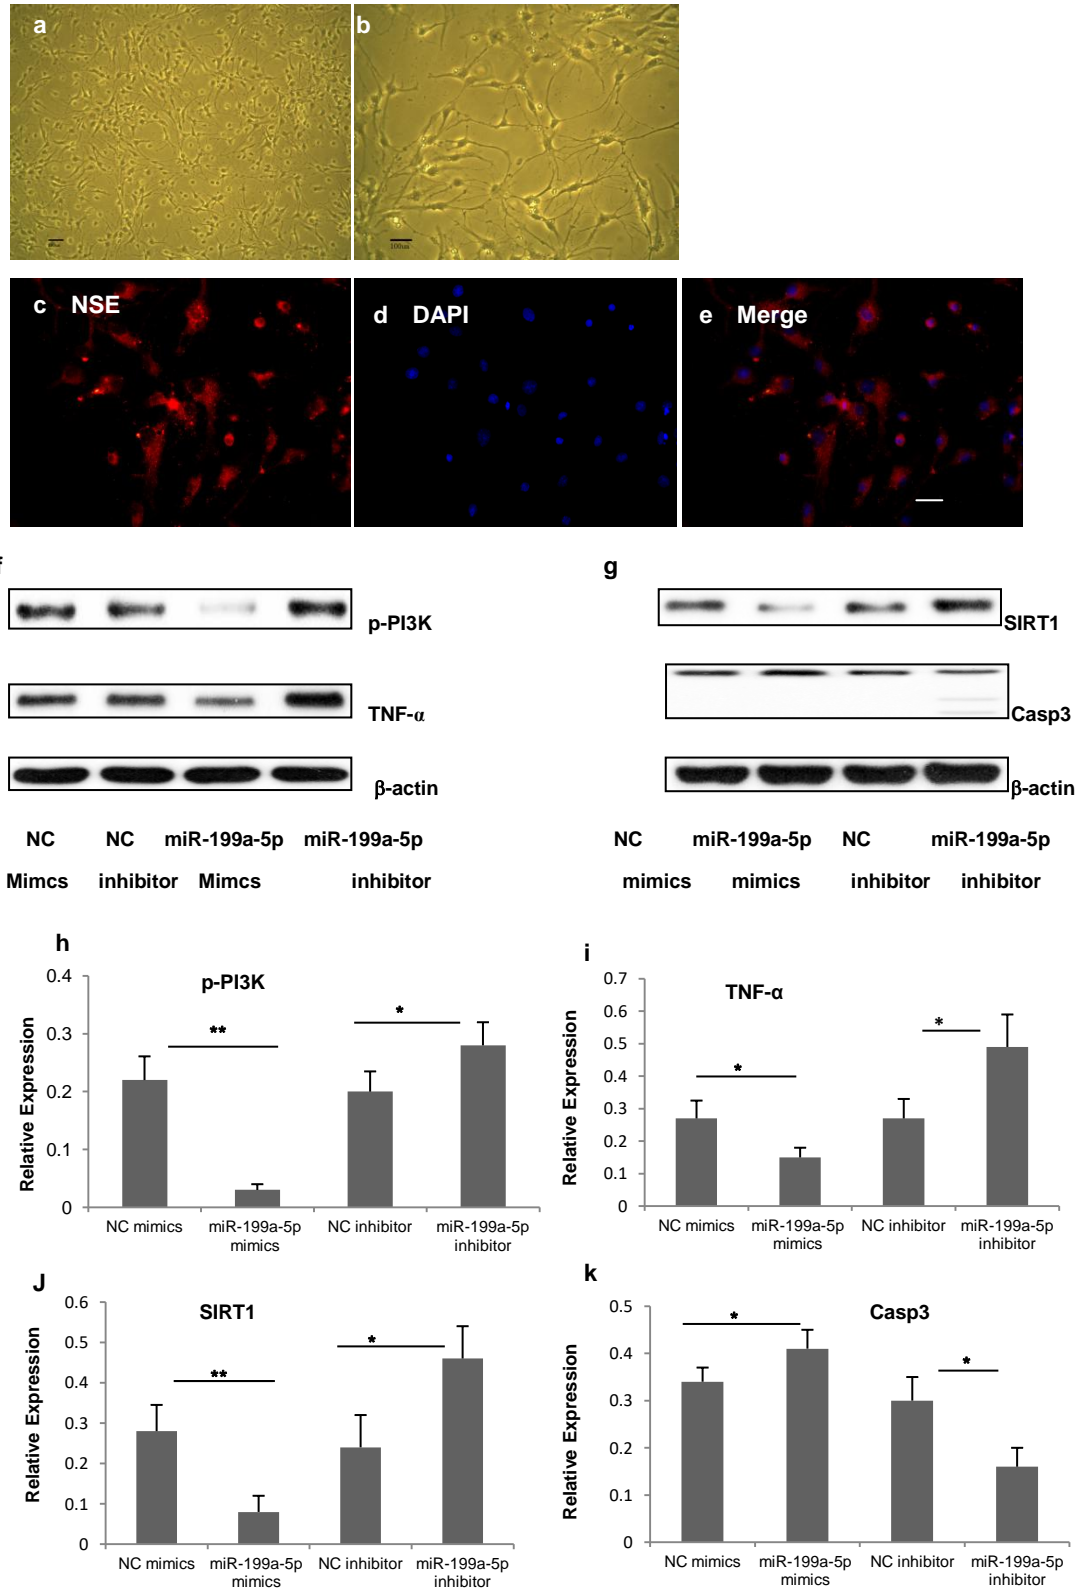

4. Fig. S4. MiR-199a-5p inhibitors PI3k, TNF- $\alpha$ , SIRT1 and Casp3. (a, b). primary neuronal culture. a,  $\times 100$ ; b,  $\times 200$ . (c, d, e) primary neurons staining by NSE and DAPI. (h, i, j, k) Western blot analysis of p-PI3K, TNF- $\alpha$ , SIRT1 and Casp3 protein expression in primary neurons following transfection. Scale bars = 100 $\mu$ m.

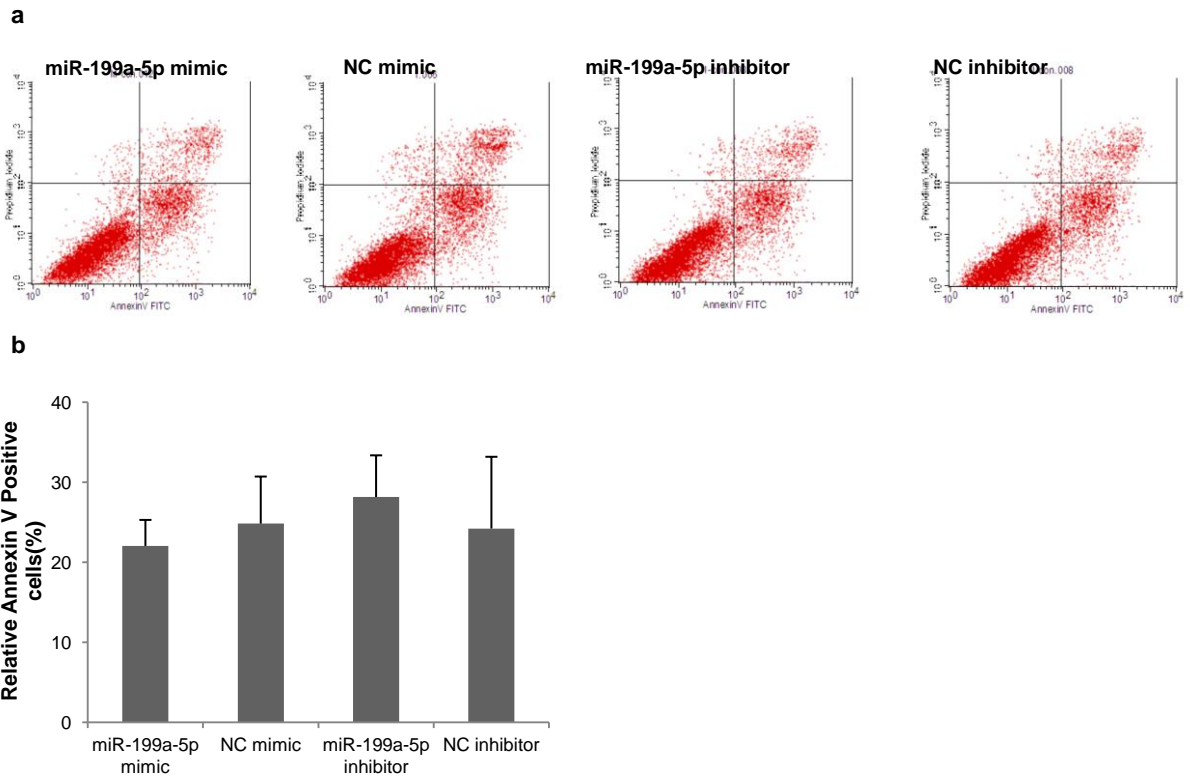

**5. Fig. S5. Effect of miR-199a-5p on PC12 cells apoptosis detected by flow cytometer.** (a) Flow cytometric analysis of PC12 cells were treated with miR-199a-5p mimics and inhibitors. (b) Data are presented as the percentage of Annexin V positive cells which analyzed by flow cytometer. The values are expressed as the mean  $\pm$ SD. \* $P < 0.05$ , \*\* $P < 0.01$ .

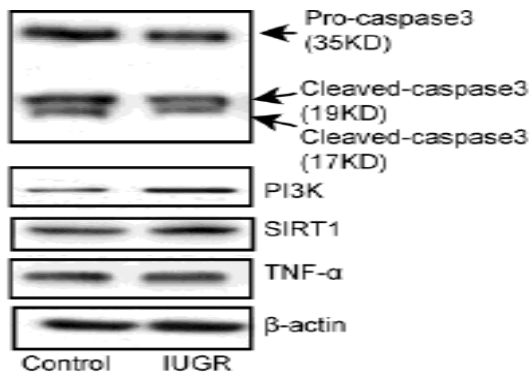

**Caspase-3:**

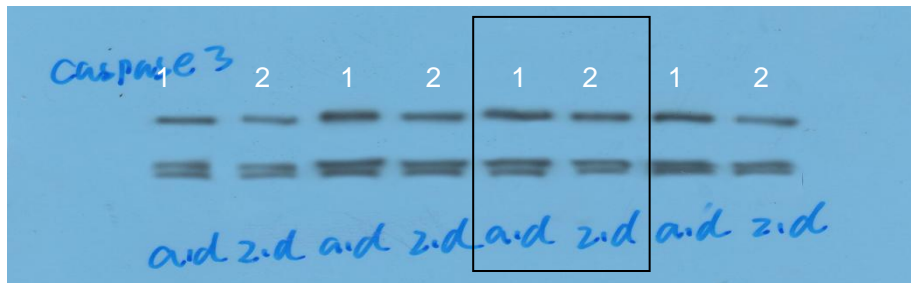

**PI3K:**

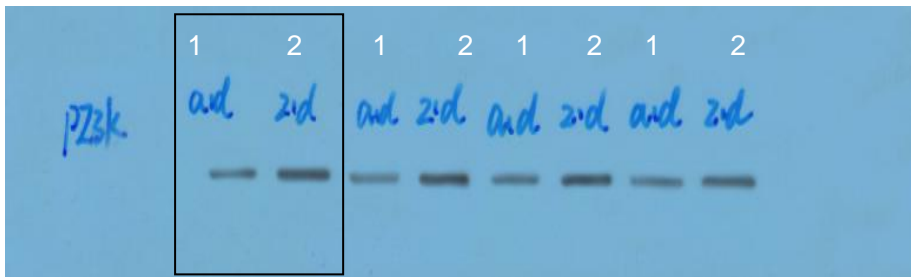

**SIRT1:**

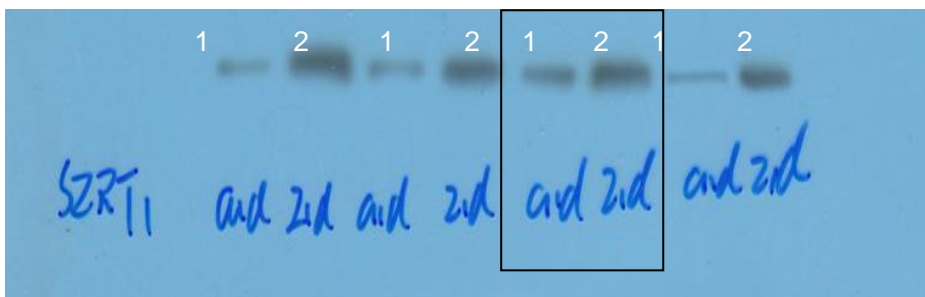

**TNF- $\alpha$ :**

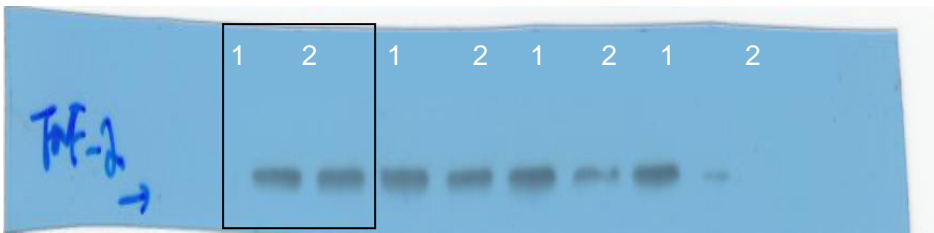

**$\beta$ -actin:**

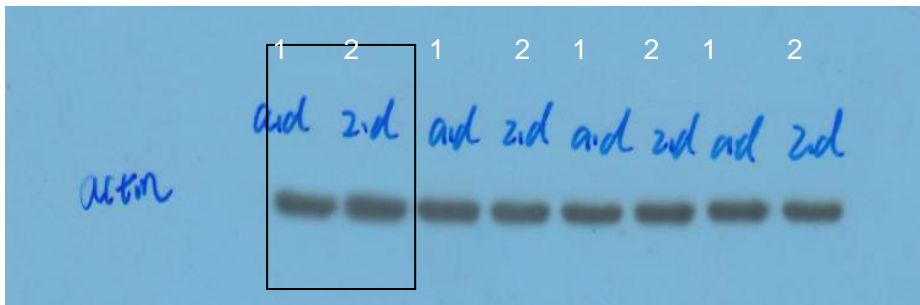

**Figure S6.** Original Western image for Figure 3a. 1, control group; 2, IUGR group.



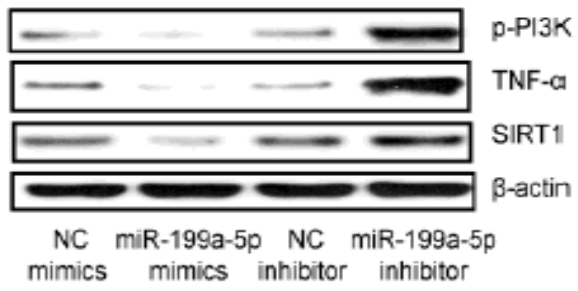

**p-PI3K**

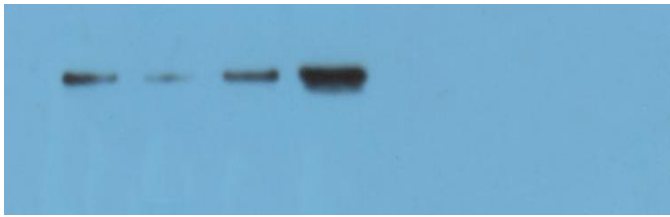

**TNF-α**

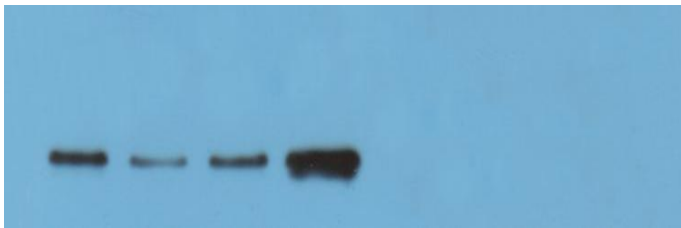

**SIRT1**

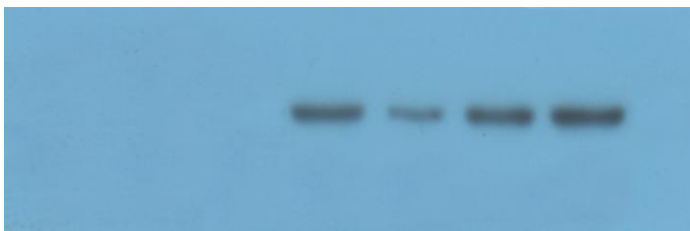

**β-actin**

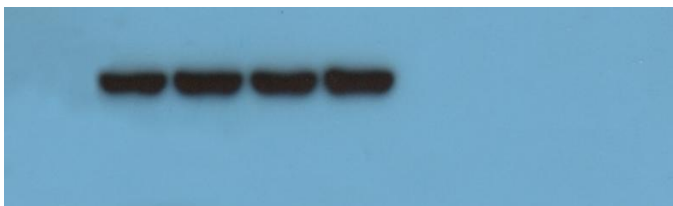

**Figure S7.** Original Western image for Fig. 4f.

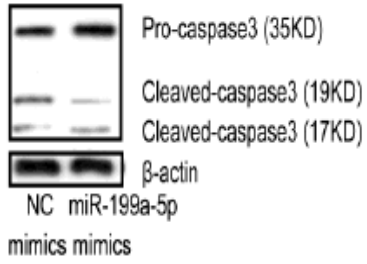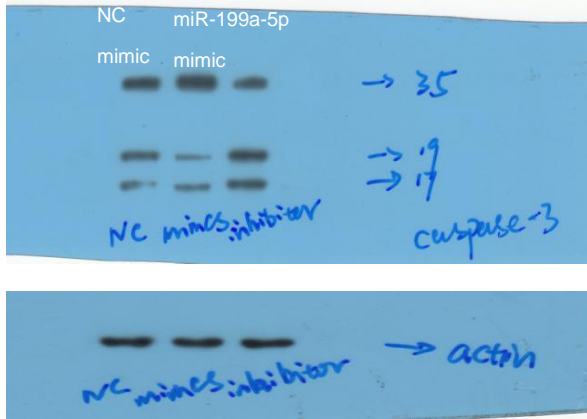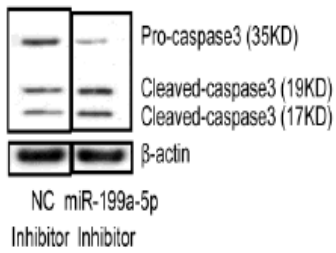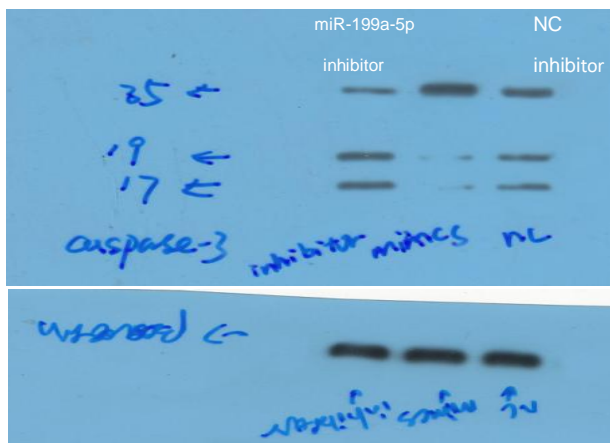

Figure S8. Original Western image for Fig. 5b.

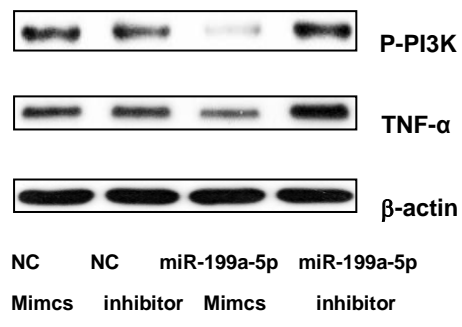

**p-PI3K**

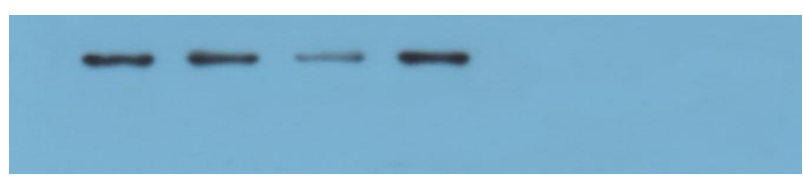

**TNF-α**

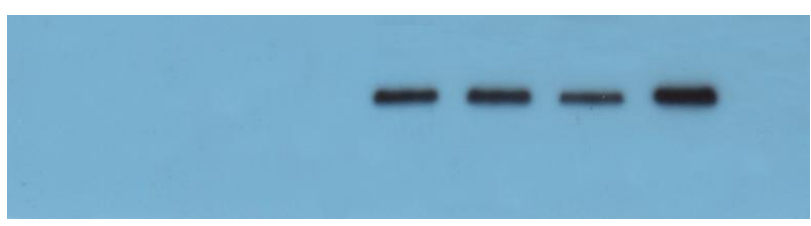

**β-actin**

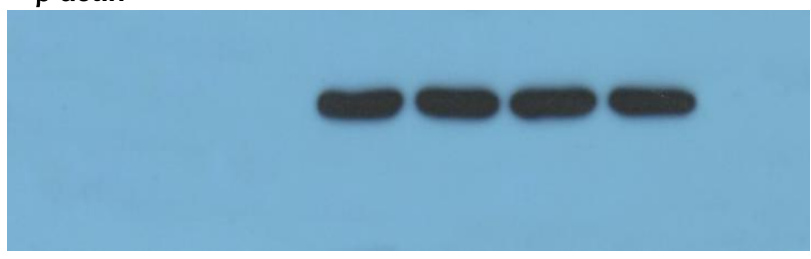

**Figure S9.** Original Western image for Fig. S4f.

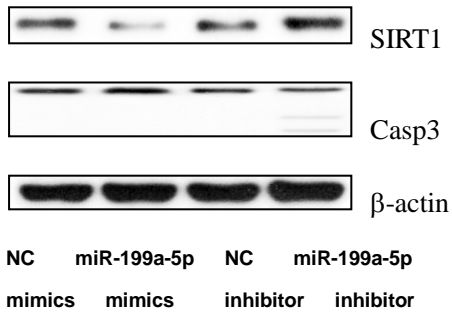

**SIRT1**

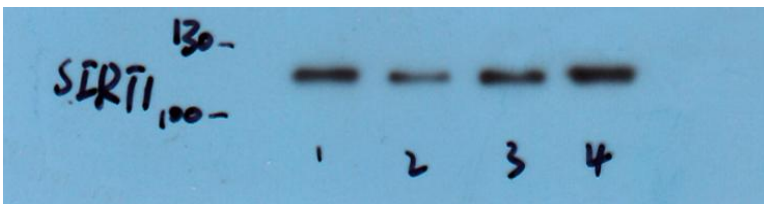

**Casp3**

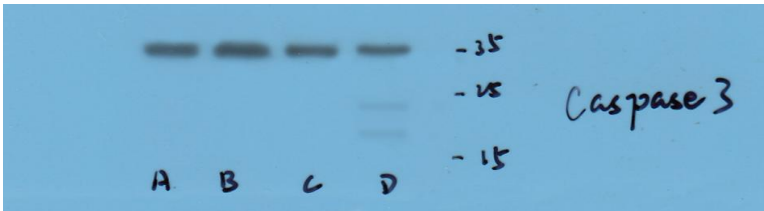

**β-actin**

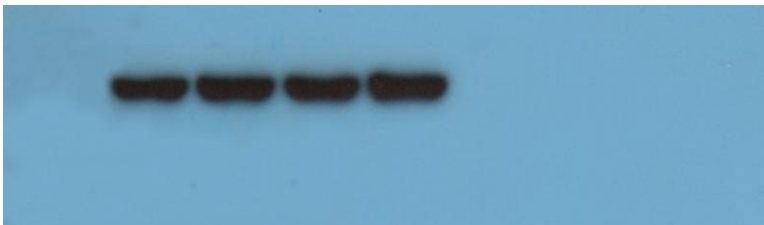

**Figure S10.** Original Western image for Fig.S4g.

| <b>Mature miRNA name</b> | <b>Mature sequences (5'-3')</b> |                         | <b>Predicted target gene</b>                              |
|--------------------------|---------------------------------|-------------------------|-----------------------------------------------------------|
| rno-miR-199a             | rno-miR-199a-5p                 | CCCAGUGUUCAGACUACCUGUUC | Sirt1,Atp2,Tnf,casp3,<br>pole3,acer2,Sumo3,pi3k           |
|                          | rno-miR-199a-3p                 | ACAGUAGUCUGCACAUUGGUUA  | Rab6a,Bre,Aspa,Ankfy1,<br>sgsm2,Depdc5,March10            |
| rno-miR-325              | rno-miR-325-5p                  | CCUAGUAGGUGCUCAGUAAGUGU | Trip11,Pla2g2c,Plk1,Zfp407,<br>Ncbp3,Tnfsf9,Nr2f2         |
|                          | rno-miR-325-3p                  | UUUAUUGAGCACCUCUAUCAA   | Npc2,vamp7,Fpr2,Prmt1,<br>IkIf1,Nol8,cdn1                 |
| rno-mir-219              | rno-miR-219a-1-3p               | AGAGUUGCGUCUGGACGUCCCG  | Bcor,Styl5,Tspan7,Lancl3,cy<br>bb,Dynlt3,Rbm3             |
|                          | rno-miR-219a-5p                 | UGAUUGUCCAAACGCAAUUCU   | Otc,Hdac6,Apex2,Rrag13,<br>Pdha1,Pola1,Flt3               |
| rno-miR-664              | rno-miR-664-1-5p                | CUGGCUGGGGAAAAAGAUUGG   | Slc25a44, Dicer1, Zbtb34,<br>Ncoa1,Insm2,Dnai2,Slco1b2    |
|                          | rno-miR-664-3p                  | UAUUCAUUUACUCCCCAGCCUA  | Paip1, Ndr4, Hey2,<br>Nipal1, Aqp1, Slc2a5, Itga9,        |
| rno-miR-551b             | rno-miR-551b-5p                 | GAAAUCAAGCUUGGGUGAGACCU | Nbl1 ,Casp9, Dctn4, Coq4,<br>Klf12, Nhsl1, Usf1, Hoxa2    |
|                          | rno-miR-551b-3p                 | GGCGACCAUACUUGGUUCAGU   | Srsf5, Btd7, Ipo7, Skap2,<br>Trak1, Cbl11, Ptpbh,Skp2     |
| rno-mir-34C              | rno-miR-34c-3p                  | AAUCACUAACCACACAGCCAGG  | Cpsf4, Glrx, Lox, Hdhd2,<br>Polr2c, Rnf2,Lix1, Eepd1      |
|                          | rno-miR-34c-5p                  | AGGCAGUGUAGUUAGCUGAUUGC | Bcor,Tspan7,Cybb,<br>Slc38a5, Porcn, Wdr13,<br>Eras, Plp2 |
| rno-miR-195              | rno-miR-195-5p                  | UAGCAGCACAGAAAUAUUGGC   | Flot1, Eya3, swt1,Rff1 ,<br>Cngn3, Ifitm1, Nodal, Thoc2   |
|                          | rno-miR-195-3p                  | CCAAUAUUGGCUGUGCUCCA    | Tbp,P2rx4, Szrd1,<br>Lmo1,Cdh8,Sf1,Megf11                 |
| rno-miR-204              | rno-miR-204-5p                  | UUCCCUUUGUCAUCCUAUGCCU  | Casp3,Sirt1,Zfx,Prima1,Tcea<br>3,Prcc2b,Pdcl,Rnd3,Sf1     |
|                          | rno-miR-204-3p                  | GCUGGGAAGGCAAAGGGACGUU  | Pdcl3,Pla2r1,Banf1,Dtd2,<br>Xpo7,Lrnf2,Lmf1,Timp2         |
| rno-miR-483              | rno-miR-483-5p                  | AAGACGGGAGAAGAGAAGGGAG  | Bcor,Otc,Xk,Cybb,Lancl3,P<br>orch,Ebp,Wdr13,Rbm3          |
|                          | rno-miR-483-3p                  | CACUCCUCCCCUCCGUCUUGU   | Sra1,Fech,Galr1,Bap1,Scn1b<br>,Git1,Hipk2,Wipf3,Tns3      |
| rno-miR-322              | rno-miR-322-5p                  | CAGCAGCAAUUCAUGUUUUGGA  | Lrp6,Ovov1,G2e3,Hoxa4,<br>Lamc2,mitf,Cxcl12,Ret           |
|                          | rno-miR-322-3p                  | AAACAUGAAGCGCUGCAACA    | Wdr26,Klf8,Gnrhr,Polh,Irf5,<br>Nfib,Bdp1,Gpm6a            |

|              |                 |                               |                                                                                |
|--------------|-----------------|-------------------------------|--------------------------------------------------------------------------------|
| rno-miR-329  | rno-miR-329-5p  | AGAGGUUUUCUGGGUCUCUGUUUC      | Nadk2,Ccdc2,Strd4,Gfra3,<br>Cd14,Gde1,Scai,Ehd1                                |
|              | rno-miR-329-3p  | AACACACCCAGCUAACCUUUUU        | Brat1,Sox6,Wdte1,Pbx3,<br>Rgs8,Tead2,Ankfy1,Etv3                               |
| rno-miR-196b | rno-miR-196b-5p | UAGGUAGUUUCCUGUUGUUGGG        | Xylt1,Tmx3,Ptcd1,neur11,<br>Nxt2,Cu14b,Wtap,Fv1                                |
|              | rno-miR-196b-3p | UCGACAGCACGACACUGCCUUCA       | Girx5,Cldn2,Zmiz1,Megf11,<br>Gfy,KdeIr1,Smarcc1,Mpp2                           |
| rno-miR-449a | rno-miR-449a-5p | UGGCAGUGUAUUGUAGCUGGU         | Calr4,Pan3,Mafk,Gpc2,,<br>Traf3,Rftn2,Sumo1,Naif1                              |
|              | rno-miR-449a-3p | CAGCUAACAUUGCAACUGCUCUC       | Nfib,Tnp1,Ikzf2,Sstr1,<br>Smoc2,Mill1,Casp2,Ube2n                              |
| rno-miR-324  | rno-miR-324-5p  | CGCAUCCCCUAGGGCAUUGGUGU       | Prr36, Zfp498, Cinp,<br>Laptm5,Nipal3, Poc5,<br>Ctdsp1, Gla                    |
|              | rno-miR-324-3p  | CCACUGCCCCAGGUGCUGCUGG        | Pdha1, Baz2a, Nipal3, Enc1,<br>Gypc, Map2, Cytip, Tcf23                        |
| rno-miR-448  | rno-miR-448-5p  | AACAUCCUGCAUAGUGCUGCCA        | Atp6ap2, Bcor, Otc, Sytl5,<br>SrpX, Xk, Cybb, Dynlt3                           |
|              | rno-miR-448-3p  | UUGCAUAUGUAGGAUGUCCCA         | Bcor, SrpX, Tbc1d25,<br>Rbm3,Ftsj1, Wdr13,<br>, Gata1,Pqbp1                    |
| rno-miR-375  | rno-miR-375-5p  | GCGACGAGCCCCUCGCACAAACC       | Mrm2, Sfn,Usp48, Fgf1,<br>Rsad2, C5ar1, Grin2d,<br>Gprin3                      |
|              | rno-miR-375-3p  | UUUGUUCGUUCGGCUCGCGUGA        | Mark3, Scamp1,<br>Nme5,Cys1, Asap2,<br>Nr1h2,Gsg2, Relt                        |
| rno-miR-702  | rno-miR-702-5p  | GUGAGUGGGGUGGUUGGCAUG         | Akap4, Cinp,Traf3, Stpg1,<br>Lypla2, Kazn, Pla2g2d,<br>Wdr41,                  |
|              | rno-miR-702-3p  | UGCCACCCUUUACCCACUCCA         | Xk,Tsr2, Ephb4, Cdk5r2,<br>Arl13a, Zadh2, Rce1, Snx32,                         |
| rno-miR-541  | rno-miR-541-5p  | AAGGGAUUCUGAUGUUGGUCACAC<br>U | Syp, Pan3, Usp48, Shtn1,<br>Smn1, Mat1a,<br>Tnfsf18, Park7                     |
|              | rno-miR-541-3p  | AGUGGCGAACACAGAAUCCAUC        | Cpsf2, Cldn2, Atf6, Pep411,<br>Ptpn13, Rhot1, Coa4, Ptprr                      |
| rno-mir-218b |                 | CAUGGUUAGAUCAAGCACAA          | SMCP,POLR2G, TEX14,<br>H2AFZ, ERI2, TRPV5,<br>PIGW, PPP1R14C,<br>SGK494, MBNL3 |

Table S1. The sequence and target gene of differentially expressed miRNAs
